# Supplementary material
Source: HighWire-hosted journal article supplement (http://d2538ggaoe6cji.cloudfront.net/highwire/filestream/45119/field_highwire_adjunct_files/0/149484-1.pdf)
Supplement: 149484-1.pdf [file 149484-1.pdf]

1 **Supplements**

2

3 **Supplemental Data Sets**

4

5 **Supplemental Data Set 1:** List of sequences used in this study.

6 **Supplemental Data Set 2:** Primer Sequences for the amplification of *ABS*-like, *GOA*-like, and

7 *B<sub>sister</sub>* genes or cDNA.

8

9 [see separate Excel file](#)

10

11 **Supplemental Figures**

12

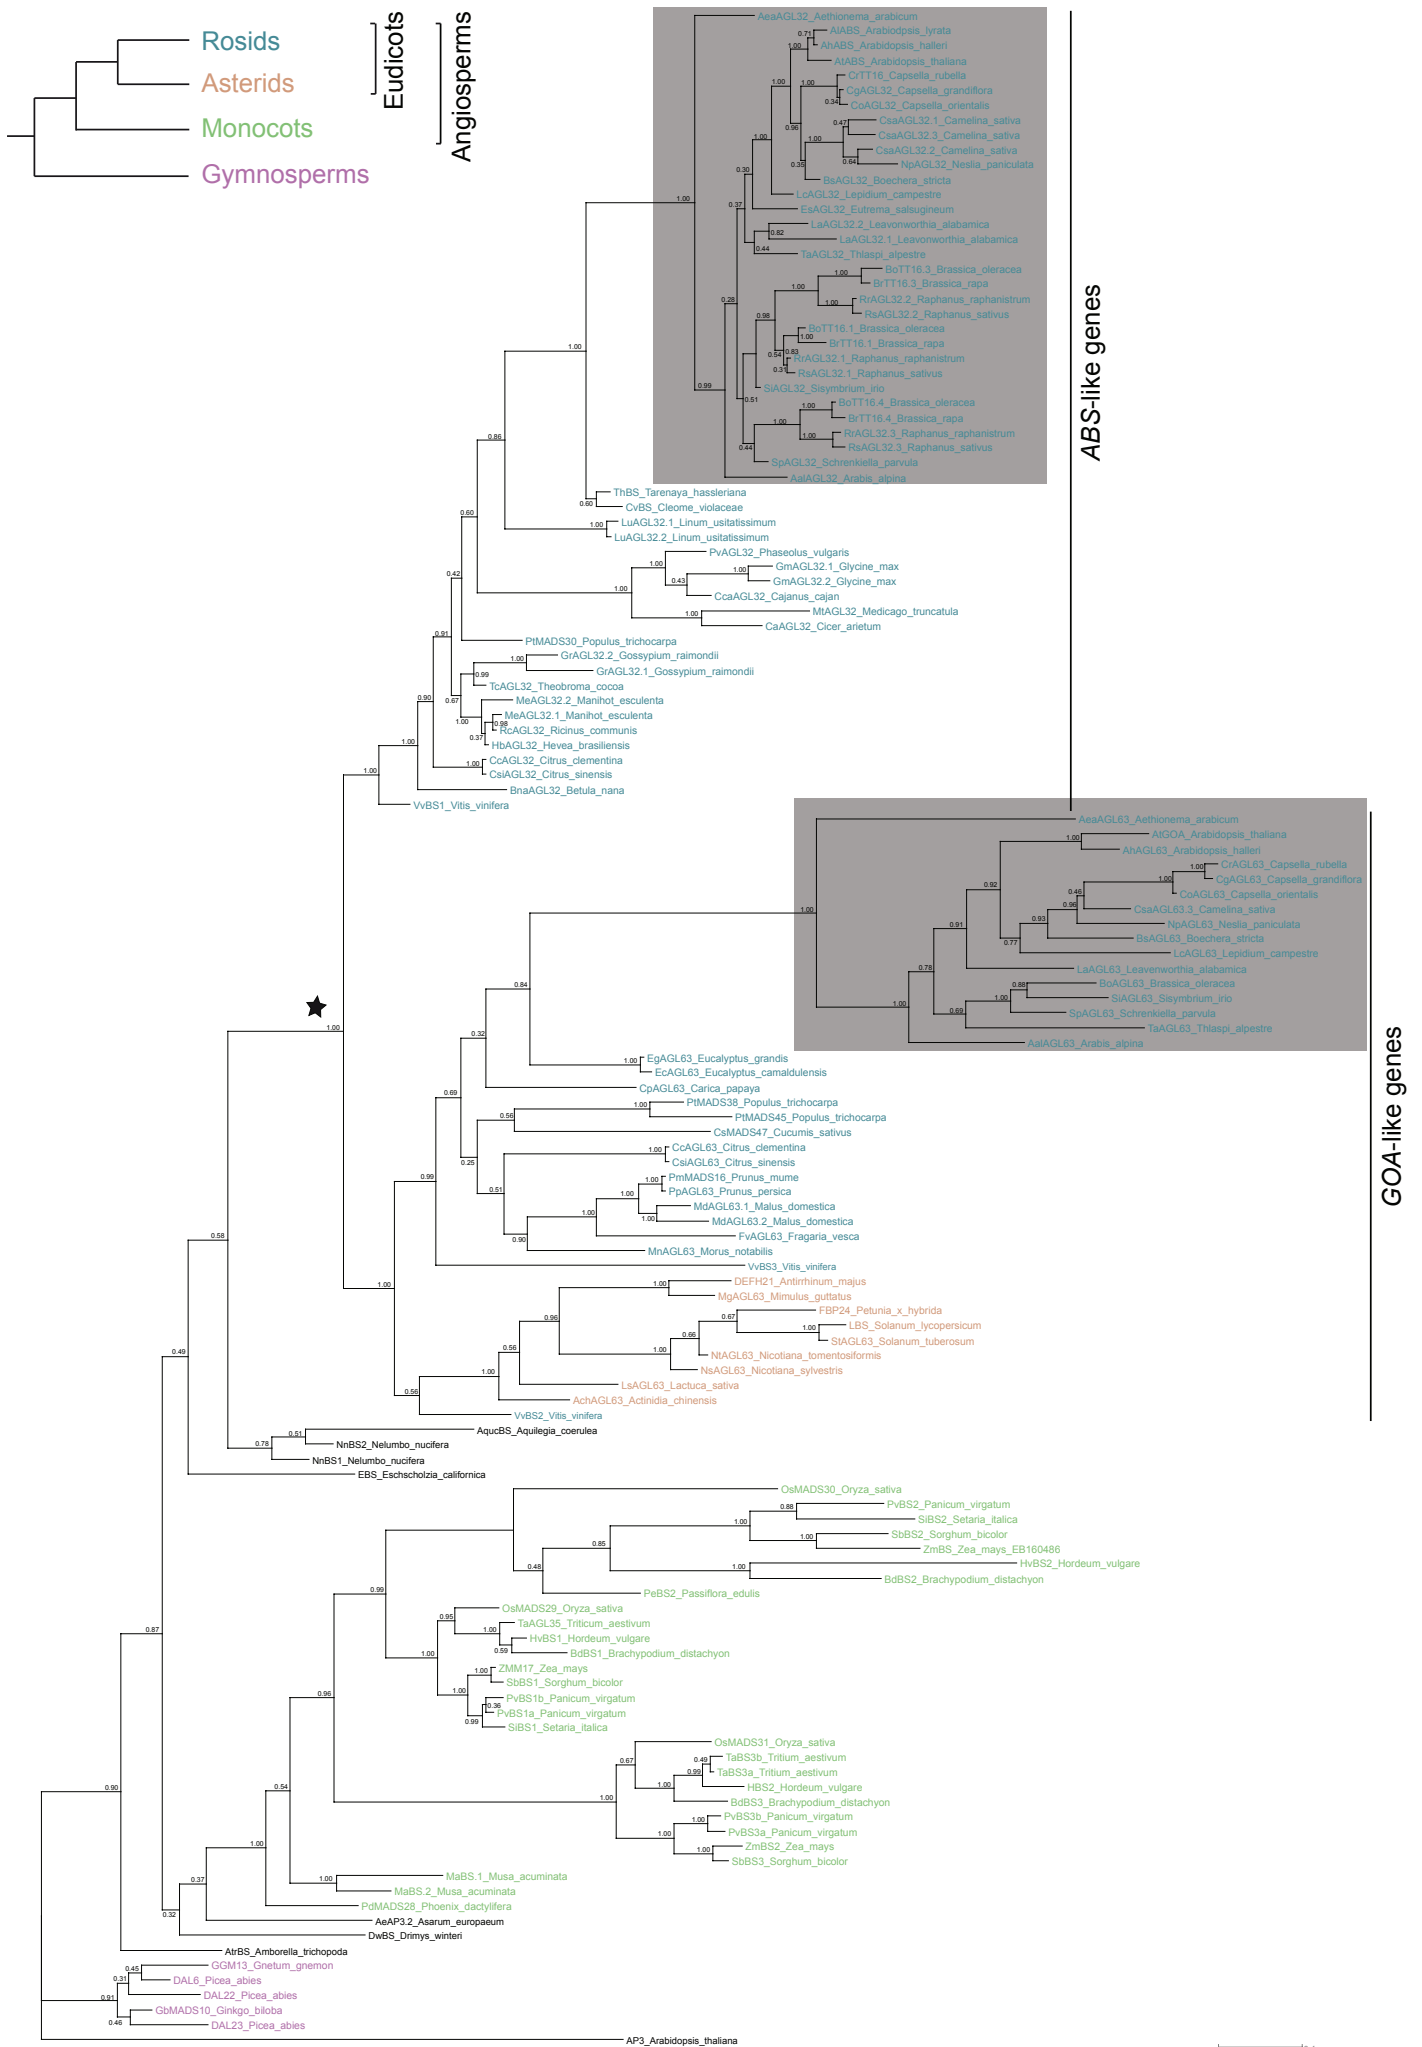

**Supplemental Figure 1: Phylogeny of  $B_{sister}$  genes of seed plants as reconstructed by Bayesian inference based on protein sequences.** The duplication event of the  $B_{sister}$  genes resulting in *ABS*- and *GOA*-like genes is indicated by a star. The clades of *ABS*- and *GOA*-like genes are marked on the right. The *ABS*- and *GOA*-like genes of Brassicaceae are indicated by shading. APETALA3 (AP3) was used as representative of the outgroup. Posterior probabilities of the MrBayes phylogeny are shown at the corresponding nodes. The branch lengths are drawn proportionally to the number of substitutions. Upper left corner: simplified phylogeny of seed plants with a color code for the large phylogeny; purple: gymnosperm genes, green: genes from monocots, red: genes from Asterids, blue: genes from rosids.

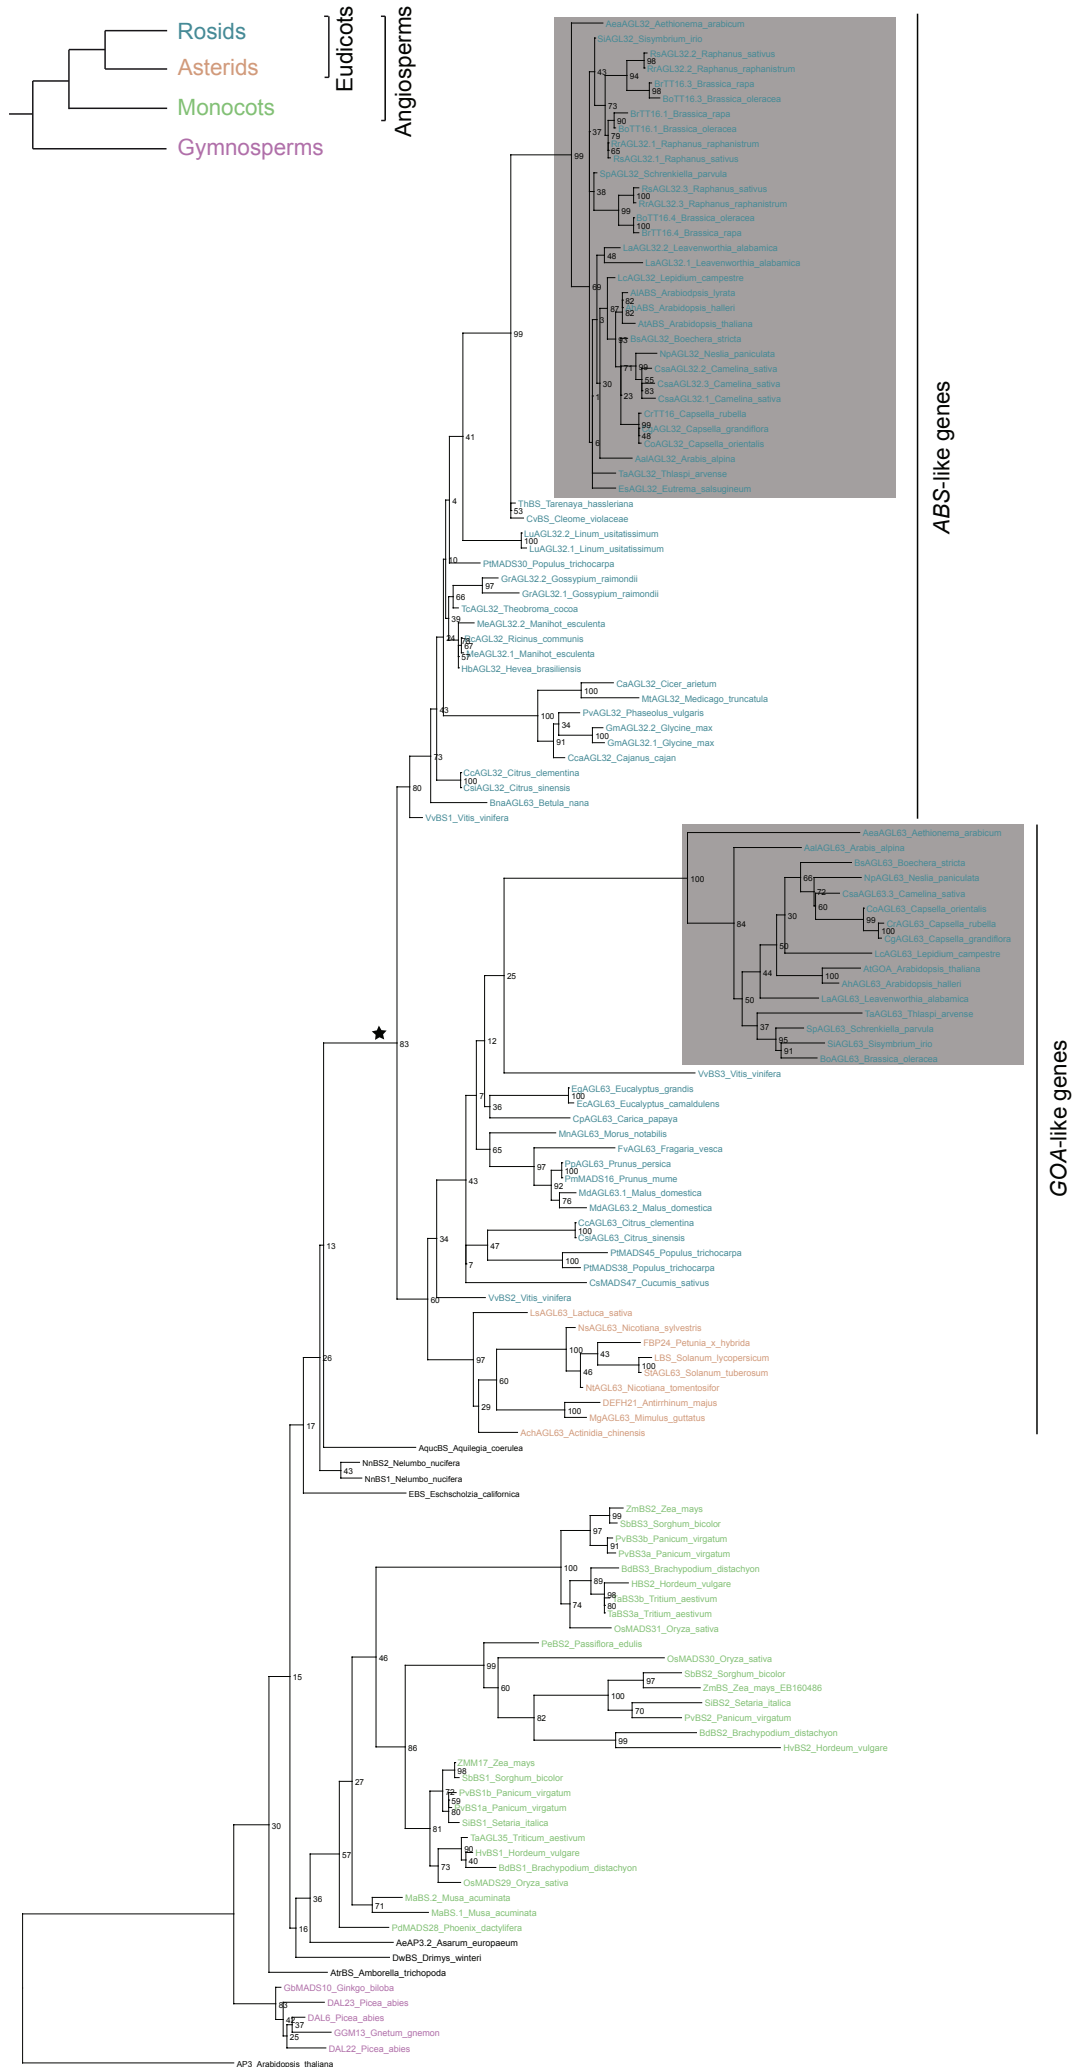

**Supplemental Figure 2: Maximum Likelihood phylogeny of *B<sub>st</sub>* genes in seed plants reconstructed based on protein sequences.** The duplication event of the *B<sub>st</sub>* genes resulting in *ABS*- and *GOA*-like genes is indicated by a star. The clades of *ABS*- and *GOA*-like genes are marked on the right. The *ABS*- and *GOA*-like genes of Brassicaceae are indicated by shading. *APETALA3* (*AP3*) was used as representative of the outgroup. Bootstrap values are shown at the corresponding nodes. The branch lengths are drawn proportionally to the number of substitutions.

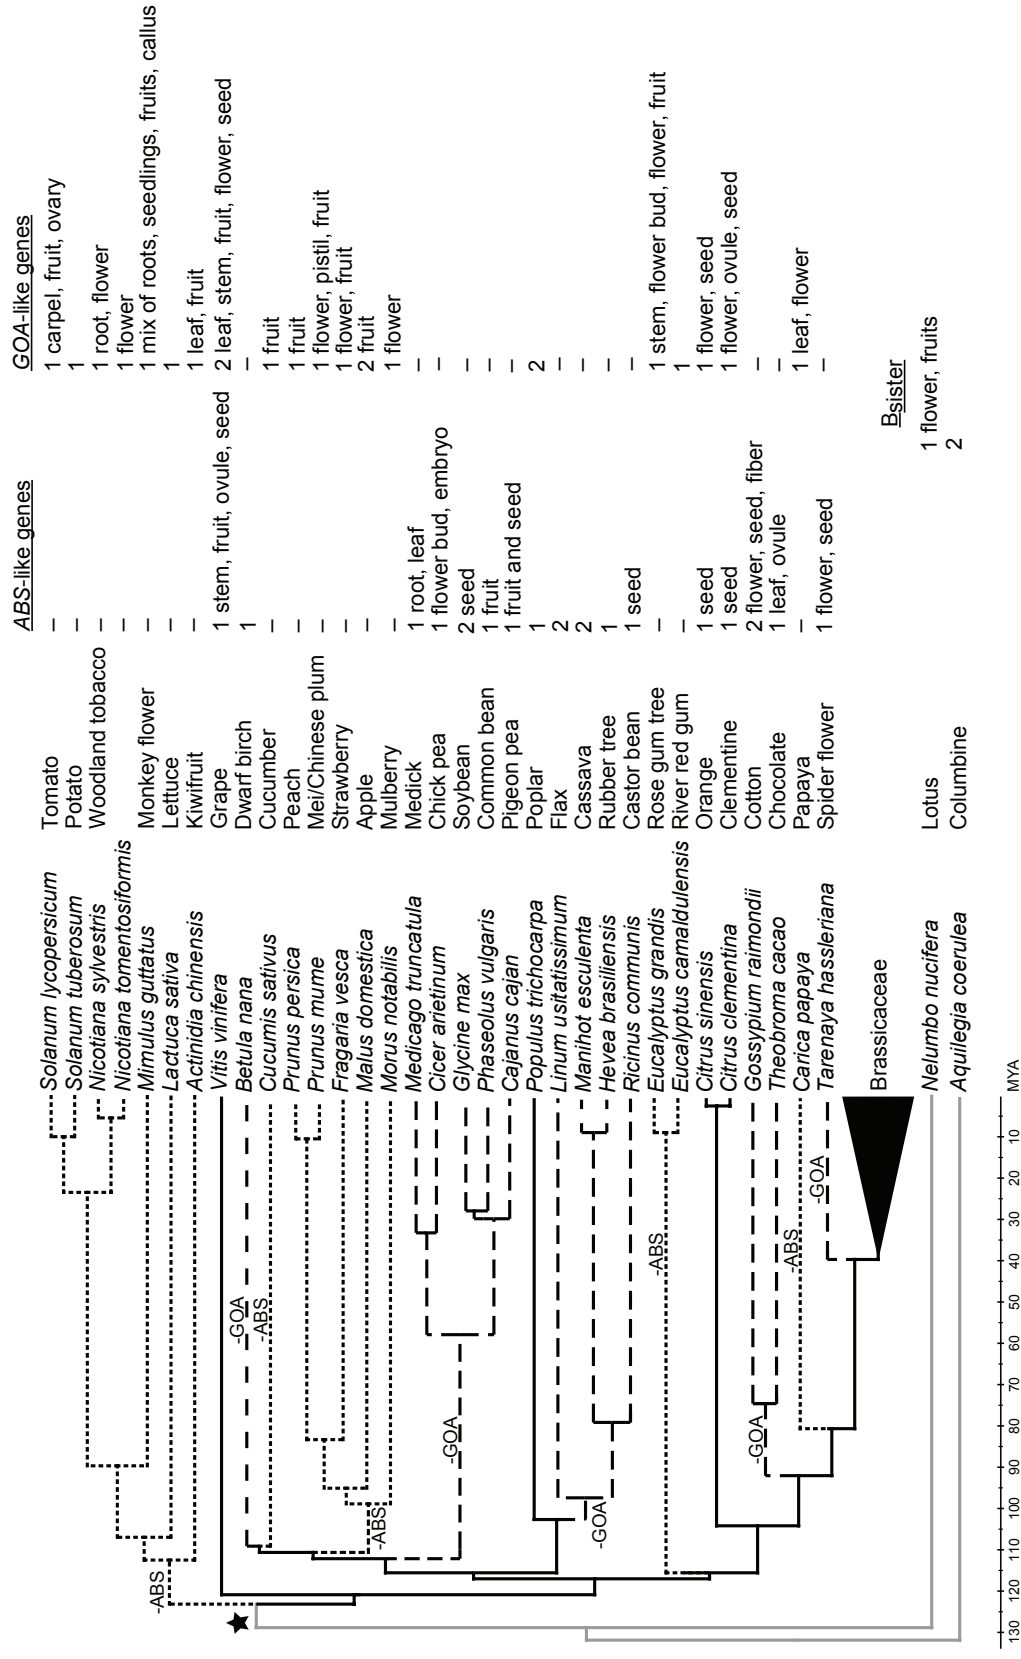

**Supplemental Figure 3: Expression pattern of ABS- and GOA-like genes of different eudicots.** The phylogeny was drawn according to (Magallón et al., 2015). Branches leading to lineages having both ABS- and GOA-like genes are shown in solid black lines; branches leading to lineages which do not have GOA-like genes are shown in broken lines; branches leading to lineages which do not have ABS-like genes are shown in dotted lines. Loss of ABS- and GOA-like genes is marked by -ABS and -GOA, respectively on the corresponding branches. Estimated divergence times (in MYA, Million Years Ago) are given below the phylogeny as determined by (Magallón et al., 2015). Branches leading to lineages which diverged before the duplication of ABS- and GOA-like genes are shown in gray. The stem group in which the duplication event of ABS- and GOA-like genes likely happened, is indicated by a star. For simplification, the Brassicaceae species are combined to a triangle. The numbers next to the species indicate the number of identified ABS- and GOA-like genes. The tissue of gene expression was identified by NCBI BLAST searches in the following short read archives (SRA): *Nicotiana sylvestris* (ERX248671, ERP002501) (Stierro et al., 2013); *Nicotiana tomentosiformis* (ERX248672, ERX248675) (Stierro et al., 2013); *Actinidia chinensis* (SRX219918, SRX219919, SRX219918)(Huang et al., 2013); *Cucumis sativus* (SRX732893, SRX7328934) (Zhao et al., 2016); *Prunus persica* (SRX173255); *Prunus mume* (SRX177763); *Fragaria vesca* (SRR1107994, SRX030874, SRX030797) (Shulaev et al., 2011; Kang et al., 2013); *Morus notabilis* (SRR1210501) (Li et al., 2014); *Medicago truncatula* (SRX2235516, SRX1998644) (Afkhami and Stinchcombe, 2016; Bond et al., 2016); *Cicer arietinum* (SRX208033, SRX125162) (Singh et al., 2013; Pradhan et al., 2014); *Glycine max* (SRR1777405) (Song et al., 2013); *Phaseolus vulgaris* (SRX963056) (Astudillo-Reyes et al., 2015); *Cajanus cajan* (SRR4341980); *Eucalyptus grandis* (SRX367258); *Theobroma cacao* (SRX278083, SRX277980) (Motamayor et al., 2013); *Carica papaya* (SRX1770718, SRX1770817) (Urasaki et al., 2012); *Tarenaya hassleriana* (SRX393170, SRX466643) (Bhide et al., 2014; Külahoglu et al., 2014) and *Aquilegia coerulea* (SRX152572, SRX152573, SRX152575). Expression data of the B<sub>sister</sub> MADS-box genes from *Vitis vinifera* were taken from (Grimplet et al., 2016), of the GOA-like gene from *Eucalyptus grandis* was taken from (Dias et al., 2005), of the B<sub>sister</sub> genes from the two Citrus species from (Hou et al., 2014). The accession numbers for the cDNA data from which the expression pattern for the B<sub>sister</sub> genes of the remaining species was inferred can be found in the Supplemental Data Set 1.

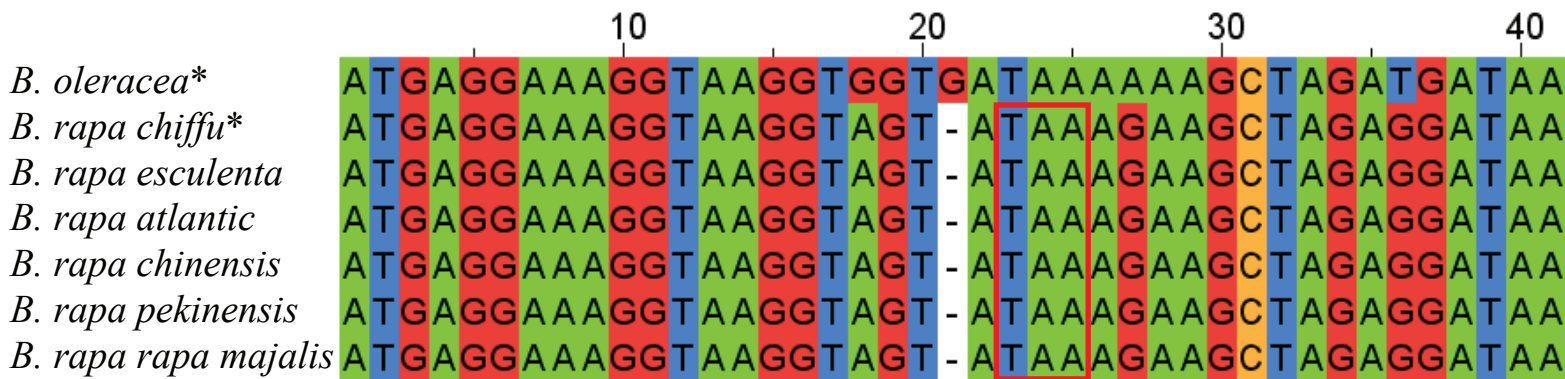

**Supplemental Figure 4: Alignment of the 5' part of the MADS-box sequences of the GOA orthologs of *Brassica oleracea* and of different *Brassica rapa* subspecies.** All analyzed *Brassica rapa* subspecies have a nonfunctional GOA ortholog due to a deletion at position 21 leading to a translational frameshift and a premature stop codon (indicated by a red rectangle). A star indicates the sequences identified in the published genomes.





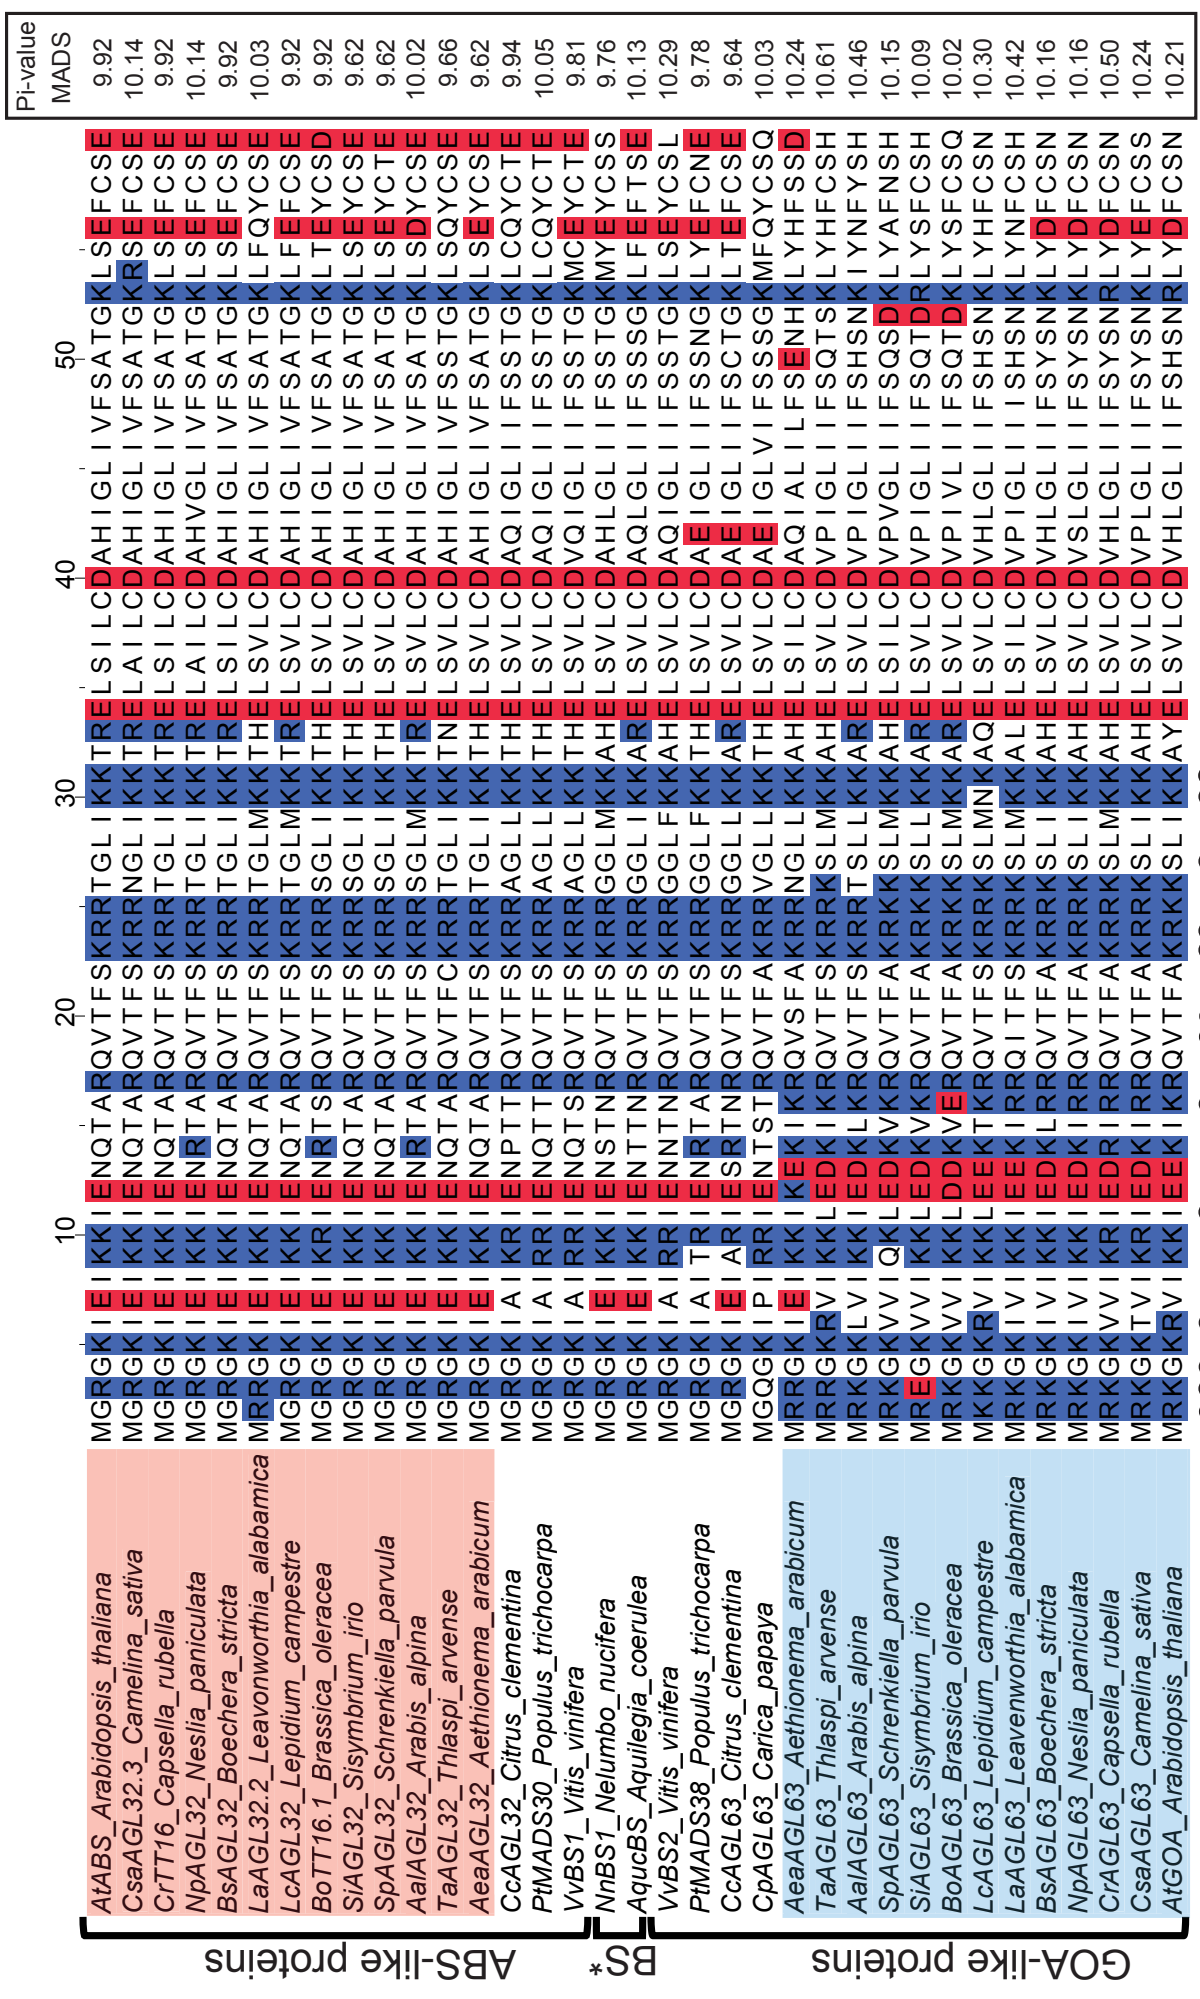

**Supplemental Figure 6. Alignment of the MADS domains of  $B_{\text{sisfer}}$  proteins of basal eudicots (BS\*) and of ABS- and GOA-like proteins.** ABS- and GOA-like proteins of Brassicaceae species are shaded in light red and light blue, respectively. Positively and negatively charged amino acids are colored in blue and red, respectively. The pi values as calculated by the program ProtParam (Gasteiger et al., 2005) are given next to the sequences. Additional positively charged amino acid positions for GOA-like proteins of Brassicaceae are indicated by a black arrow. Black dots indicate residues important for DNA-binding in SRF and MEF2A (Pellegrini et al., 1995; Huang et al., 2000).

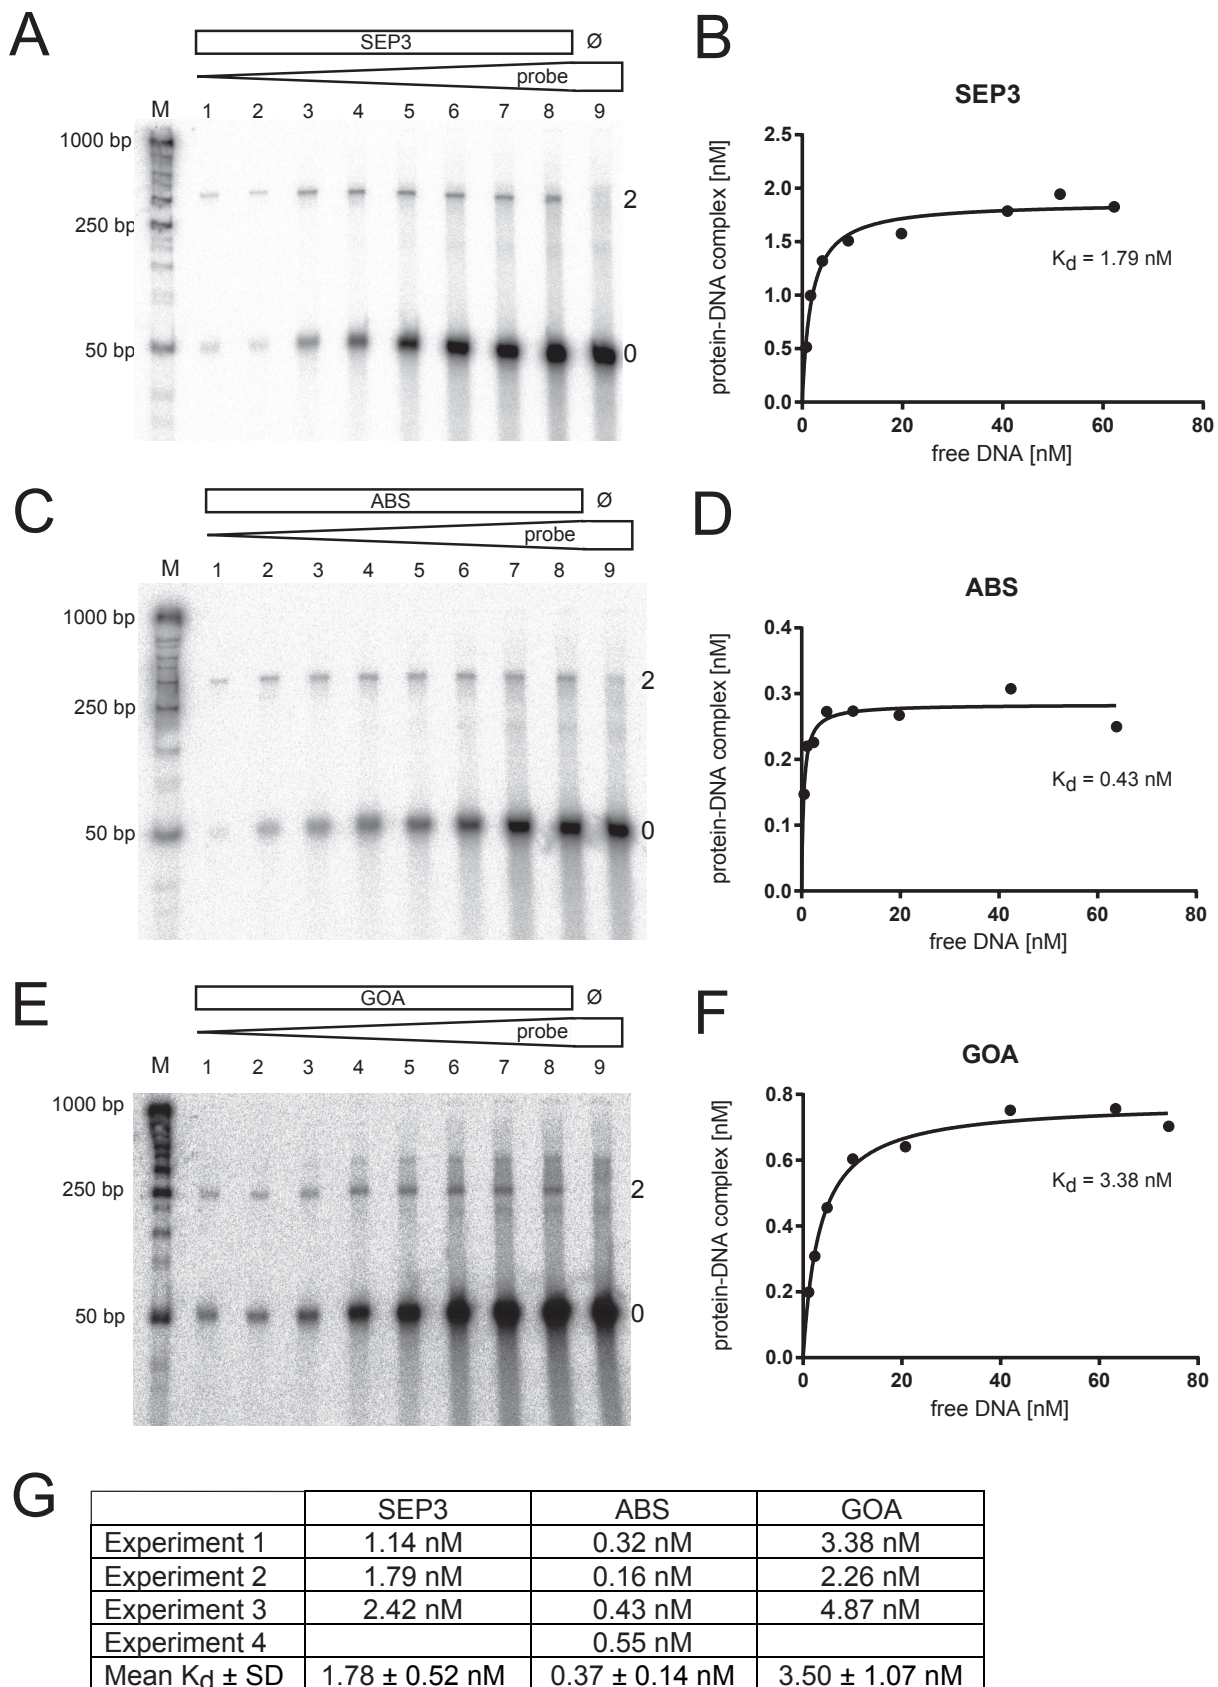

**Supplemental Figure 7. Analysis of DNA binding of SEP3 (A, B), ABS (C, D) and GOA (D, E) by electrophoretic mobility shift assays (EMSA).** Increasing concentrations of a DNA probe containing a single CARG-box were incubated with a constant amount of protein. The protein studied is indicated on top of each gel.  $\emptyset$  represents a negative control where the *in vitro* translation assay was performed using an empty pTNT vector. M indicates the DNA marker lane. The concentrations of DNA used were: 1.31, 2.62, 5.23, 10.47, 20.94, 41.87, 52.34, and 62.81 nM from lane 1 to 8. The numbers 0 and 2 adjacent to the bands represent the respective number of protein molecules bound. Next to each gel the concentration of the protein-DNA complex is shown as a function of the concentration of free DNA and the inferred dissociation constants ( $K_d$ ) are given. Graphs were calculated as described in materials and methods. The chosen gels are only an example from several independently performed experiments, for which dissociation constants are shown in (G).



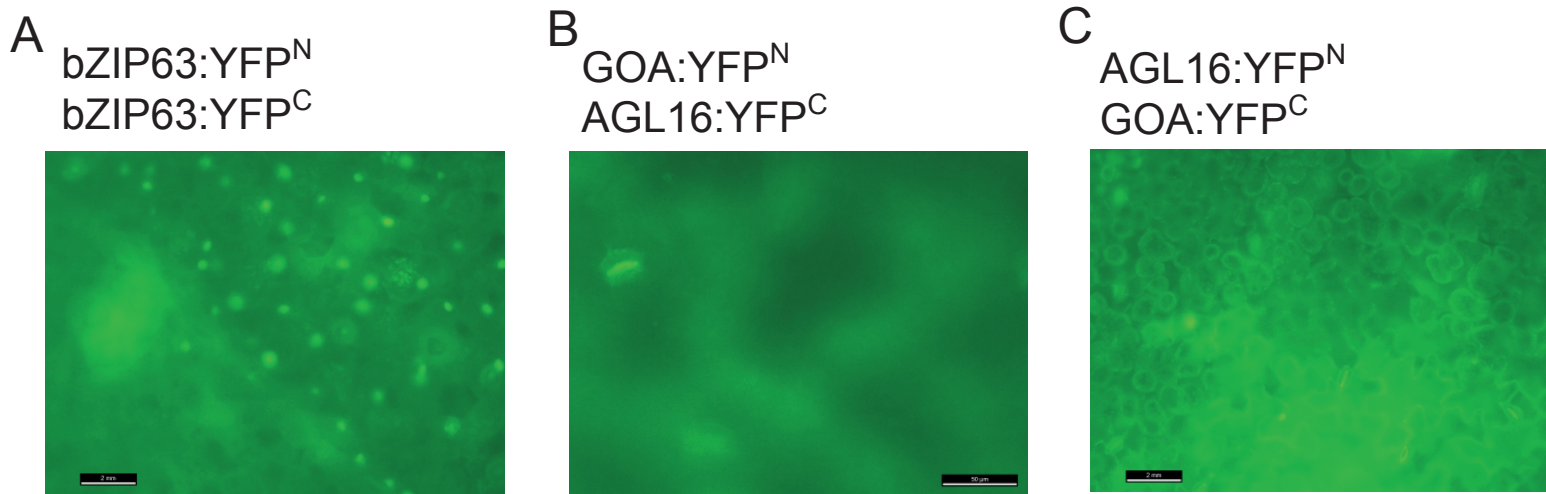

**Supplemental Figure 8: Protein dimerization analysis by bimolecular fluorescence complementation (BiFC).** bZIP63 (positive control), GOA and AGL16 were fused to the N- and C-terminal parts of YFP (YFP<sup>N</sup> and YFP<sup>C</sup>) as indicated above each subfigure. Fluorescence of nuclearly localized YFP visible as bright green dots is considered as indication for the interaction of the fusion proteins. Dimerization of bZIP63 (**A**) but no interaction between GOA and AGL16 (**B, C**) was observed. Chloroplast and cell wall auto-fluorescence are visible in several subfigures. Bars in (**A**) and (**C**) = 200  $\mu\text{m}$ ; bar in (**B**) = 50  $\mu\text{m}$ .

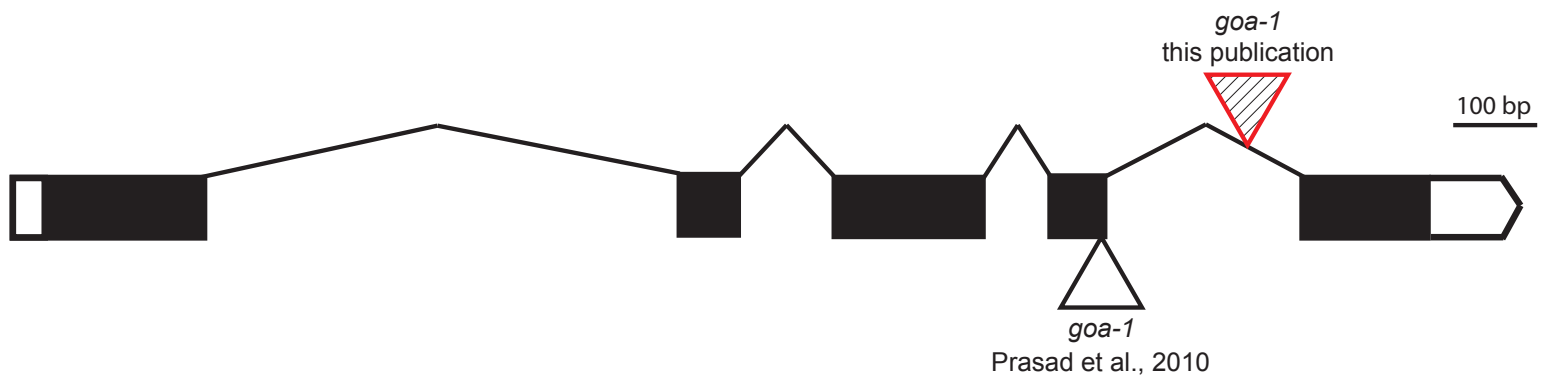

**Supplemental Figure 9: Location of the T-DNA insertion of the *goa-1* mutant line (*A. thaliana*).** Using PCR and sequencing the position of the T-DNA of the *goa-1* mutant was found to be within intron 4, but not as described by Prasad et al. (2010) in exon 3.

13 **Supplemental Tables**

14

15 **Supplemental Table 1: Phylogenetic Analysis by Maximum Likelihood (PAML) results**  
 16 **and results of the Likelihood Ratio Test for selection analysis.** lnL, Likelihood; np, number  
 17 of parameters;  $\omega_0$  and  $\omega_1$ ,  $\omega$  ratios,  $2\Delta\ln L$ , twice the difference in the Likelihood values for  
 18 the two models tested;  $\Delta np$ , difference in the number of parameters; p, p value

19

| PAML results for different models tested on <i>ABS</i> - and <i>GOA</i> -like genes                          |                |             |            |            |            |            |            |
|--------------------------------------------------------------------------------------------------------------|----------------|-------------|------------|------------|------------|------------|------------|
|                                                                                                              | lnL            | np          | $\omega_0$ | $\omega_1$ | $\omega_2$ | $\omega_3$ | $\omega_3$ |
| one ratio                                                                                                    | -11546.39      | 55          | 0.2833     |            |            |            |            |
| three ratio                                                                                                  | -11513.43      | 57          | 0.1961     | 0.2159     | 0.4411     |            |            |
| five ratio                                                                                                   | -11509.16      | 59          | 0.1983     | 0.2306     | 0.1293     | 0.4586     | 0.2202     |
| free-ratio                                                                                                   | -11445.00      | 107         |            |            |            |            |            |
| Results of the Likelihood Ratio Test for different models tested on <i>ABS</i> - and <i>GOA</i> -like genes. |                |             |            |            |            |            |            |
|                                                                                                              | $2\Delta\ln L$ | $\Delta np$ | p          |            |            |            |            |
| one vs. three                                                                                                | 65.9266        | 2           | 4.83E-15   |            |            |            |            |
| one vs. five                                                                                                 | 74.4595        | 4           | 2.59E-15   |            |            |            |            |
| one vs. free                                                                                                 | 202.7796       | 52          | 1.11E-19   |            |            |            |            |

20



25 **Supplemental Table 3: Summary of the protein interaction analysis of ABS-like proteins**  
 26 **from Brassicales as revealed by Yeast Two-Hybrid analysis.** Growth at 30°C on selective  
 27 SD –LWH medium is symbolized by +, no growth by -, weak growth by +/- . \* indicates  
 28 protein interaction at 22°C, # indicates interaction at 30°C, n.d., not determined.

| pGBKT7<br>pGADT7           | ABS<br><i>A. thaliana</i> | AalAGL32<br><i>A. alpina</i> | BhAGL32<br><i>B. holboellii</i> | CrTT16<br><i>C. rubella</i> | LcAGL32<br><i>L. campestre</i> | ThAGL32<br><i>T. hassleriana</i> |
|----------------------------|---------------------------|------------------------------|---------------------------------|-----------------------------|--------------------------------|----------------------------------|
| Homodimer formation        | +/-                       | +                            | +                               | -                           | +                              | n.d.                             |
| SEP1<br><i>A. thaliana</i> | +                         | +                            | +                               | +                           | +                              | +                                |
| SEP2<br><i>A. thaliana</i> | -                         | +*   -#                      | +                               | +*   -#                     | -                              | -                                |
| SEP3<br><i>A. thaliana</i> | +                         | +                            | +                               | +                           | +                              | +                                |
| SEP4<br><i>A. thaliana</i> | +                         | +                            | +                               | +                           | +                              | +                                |
| API<br><i>A. thaliana</i>  | +                         | +                            | +                               | -                           | +                              | +                                |

29

30 **Supplemental Table 4: Summary of the protein interaction analysis of GOA-like proteins**  
 31 **as revealed by Yeast Two-Hybrid analyses.** Growth on selective SD –LWH medium is  
 32 symbolized by +, no growth by -.

| pGBKT7<br>pGADT7               | GOA<br><i>A. thaliana</i> | CrAGL63<br><i>C. rubella</i> | LcAGL63<br><i>L. campestre</i> |
|--------------------------------|---------------------------|------------------------------|--------------------------------|
| Homodimer formation            | -                         | -                            | -                              |
| Corresponding ABS-like protein | -                         | -                            | -                              |
| AGL16<br><i>A. thaliana</i>    | +                         | -                            | -                              |

33

34 **Supplemental Table 5: Silique measurements of *goa-1* and wildtype plants of stage-17b**  
 35 **fruits.** The silique length, width and seed number per silique are given as means  $\pm$  SDs. *n* is the  
 36 number of measured fruits. Plants were grown under standard long-day conditions. n.d., not  
 37 determined.

|                      | Experiment 1 (Jena) |                     | Experiment 2 (Jena) |                     | Experiment 3 (Gießen) |                     |
|----------------------|---------------------|---------------------|---------------------|---------------------|-----------------------|---------------------|
|                      | Wildtype (n=54)     | <i>goa-1</i> (n=52) | Wildtype (n=50)     | <i>goa-1</i> (n=60) | Wildtype (n=66)       | <i>goa-1</i> (n=70) |
| Silique width in mm  | 0.83 $\pm$ 0.11     | 0.82 $\pm$ 0.16     | 0.95 $\pm$ 0.12     | 0.96 $\pm$ 0.13     | 0.82 $\pm$ 0.09       | 0.82 $\pm$ 0.08     |
| Silique length in mm | 12.65 $\pm$ 1.47    | 13.01 $\pm$ 1.88    | 13.83 $\pm$ 2.11    | 13.82 $\pm$ 1.86    | 13.13 $\pm$ 2.65      | 14.13 $\pm$ 232     |
| Seed number/fruit    | 41.02 $\pm$ 11.60   | 44.71 $\pm$ 12.71   | 48.86 $\pm$ 15.05   | 52.75 $\pm$ 11.76   | n.d                   | n.d                 |

38

39



## 40 **Supplemental Methods**

### 41 **Plant growth**

42 Seeds were obtained from the following people: *Boechera holboellii* seeds from Jochen  
43 Kumlehn, (Gatersleben, Germany), *Tarenaya hassleriana* seeds from Eric Schranz  
44 (Wageningen, Netherlands), *Arabis alpina* seeds from Maria Albani and George Coupland  
45 (Cologne, Germany), *Eutrema salsugineum* seeds from Arnould Savoure (Paris, France),  
46 *Lepidium campestre* and *Brassica napus* L. var *biennis* seeds from Klaus Mummenhoff  
47 (Osnabrück, Germany).

48 *Arabidopsis thaliana* Col-0 (NASC ID: N1092), *Capsella rubella* Monte Gargano (MTE,  
49 NASC: N9609), *Eutrema salsugineum* (accession Shandong), *Arabis alpina* (Dorfertal) and  
50 *Tarenaya hassleriana* (Purple Queen, ES1100) plants were grown in a peat based potting soil  
51 (ED73) with perlite (H. Nitsch & Sohn GmbH & Co.KG). *Brassica rapa* subspecies (seeds  
52 ordered from www.samenhaus.de), *Brassica napus* L. var *biennis* and *Arabidopsis lyrata* ssp.  
53 *lyrata* (NASC ID: N22696) plants were grown on a mixture of seedling substrate (Kammlott  
54 GmbH), sand and vermiculite (1–3 mm) (8:1:1). All plants were grown in a greenhouse under  
55 long day conditions (16 hours light and 8 hours dark). The temperature in the greenhouse was  
56 between 21 and 25°C at daytime and between 16 to 18°C at night with a relative humidity of  
57 60%. Seeds of *C. rubella* and *E. salsugineum* were sown and stratified in moist soil at 4°C in  
58 the dark for 3 days (*C. rubella*) and 14 days (*E. salsugineum*), respectively, then allowed to  
59 germinate and grown in the greenhouse until the rosette was about 2.5 cm in diameter.  
60 Subsequently, the plants were vernalized at 4°C under short day conditions (8 hours light, 16  
61 hours dark) for 6-8 weeks (*C. rubella*) or 4-5 weeks (*E. salsugineum*), respectively, and then  
62 returned to the greenhouse with long day conditions for further development.

63 *Aethionema arabicum* (KM 2416), *Sisymbrium irio*, and *Lepidium campestre* plants were  
64 grown in a mixture of loam, sand, pumice, and compost (1:2:2:5). *Ae. arabicum* seeds were  
65 sown and stratified in moist soil at 4°C in the dark for 4 days, then germinated in a climate  
66 chamber (14 hours light, 10 hours dark) at 15°C with a relative humidity of 50%. After 3 weeks  
67 the conditions were changed to 22°C (day) and 15°C (night). *Sisymbrium irio* plants were grown  
68 with 12 hours light and 12 hours dark at 22°C throughout and *L. campestre* plants were grown  
69 at with 16 hours light at 20°C and 8 hours dark at 15°C, respectively in the greenhouse.  
70 Flowering was induced by keeping the plants at 4°C for six weeks with 8 h of light per day.

71

72

### 73 ***In silico* identification of B<sub>sister</sub> genes**

74 The sequence data of previously identified B<sub>sister</sub> genes were taken from Phytozome (Goodstein  
75 et al., 2012) or NCBI (Sayers et al., 2011)(Supplemental Table 1). The genome of *Boechera*  
76 *stricta* (Lee et al., 2017) and the genome of *Eutrema salsugineum* (Yang et al., 2013) were  
77 downloaded from Phytozome. The genomes of *Arabidopsis lyrata* (Hu et al., 2011),  
78 *Schrenkiella parvula* (Dassanayake et al., 2011), *Aethionema arabicum*, *Leavenworthia*  
79 *alabamica*, *Sisymbrium irio*, a second genome of *Eutrema salsugineum* (Haudry et al., 2013),  
80 *Capsella grandiflora* and *Capsella orientalis* (Williamson et al., 2014) were downloaded from  
81 the UCSC Genome Browser (<http://grandiflora.eeb.utoronto.ca:8086/downloads.html>). The  
82 genomes of *Actinidia chinensis* (Huang et al., 2013), *Arabidopsis halleri* (DOE-JGI,  
83 <http://phytozome.jgi.doe.gov/>), *Betula nana* (Wang et al., 2013), *Camelina sativa* (Kagale et  
84 al., 2014), *Cicer arietum* (Varshney et al., 2013), *Cajanus cajan* (Varshney et al., 2012),  
85 *Eucalyptus camaldulensis*, *Lactuca sativa* (Reyes-Chin-Wo et al., 2017), *Morus notabilis* (He  
86 et al., 2013), *Nelumbo nucifera* (Ming et al., 2013), *Nicotiana sylvestris*, *Nicotiana*  
87 *tomentosiformis* (Sierro et al., 2013), *Phoenix dactylifera* (Al-Dous et al., 2011), *Prunus mume*  
88 (Zhang et al., 2012), *Raphanus sativus* (Kitashiba et al., 2014) and *Thlaspi arvense* (Dorn et al.,  
89 2015) were downloaded from the NCBI genomes database (Sayers et al., 2011). The genome  
90 of *Amborella trichopoda* (Albert et al., 2013) was downloaded from the *Amborella* genome  
91 database (<http://www.amborella.org/>). The genome of *Raphanus raphanistrum* (Moghe et al.,  
92 2014) was downloaded from RadishDB. The genome from *Lepidium meyenii* (Zhang et al.,  
93 2016) was downloaded from (<http://www.herbal-genome.cn/html/Genomes/>).

94 BLAST (Altschul et al., 1990) was used to search these genomes with the CDS of known ABS-  
95 and GOA-like genes from the most closely related species to the one studied as query sequences.  
96 The BLAST search for *Neslia paniculata* (Ågren et al., 2014) was conducted on  
97 <https://genomeevolution.org/coge/CoGeBlast.pl>. The scaffolds on which the highest scoring  
98 results were found were saved and shortened such that the remaining part contained 10 kb up-  
99 and downstream of the BLAST result. FGENESH (Salamov and Solovyev, 2000) (default  
100 settings, "Dicot plants (*A. thaliana*)") was used to predict coding sequences (CDS). The  
101 genomes of *Aquilegia coerulea* (*Aquilegia coerulea* Genome Sequencing Project,  
102 <http://phytozome.jgi.doe.gov/>), *Citrus sinensis*, *Citrus clementina* (Wu et al., 2014), *Eucalyptus*  
103 *grandis* (Myburg et al., 2014), *Fragaria vesca* (Shulaev et al., 2011), *Malus domestica* (Velasco  
104 et al., 2010) and *Prunus persica* (Verde et al., 2013) were searched using BLAST as described  
105 above at Phytozome. If a CDS was provided in the genomic region where the highest scoring  
106 results were found by Phytozome, this CDS was used for further analysis, otherwise a CDS

107 prediction was done as described above using FGENESH. The gene identified by us as  
108 *CcAGL63* in *Citrus clementina* is likely the same gene described as *CcTTI6* by Garcia-Lor et  
109 al. (2012), however since it is a *GOA*-like gene, we renamed it for better understanding.  
110 For the *GOA* ortholog from *A. lyrata* (*AlAGL63*), a BLAST search in the trace archives at NCBI  
111 (Sayers et al., 2011) was performed; the identified fragments were assembled using Sequencher  
112 version 5.2 sequence analysis software (Gene Codes Corporation) into two non-overlapping  
113 contigs separated by a fragment of unknown length. The two identified contigs and the fragment  
114 in between were verified by PCR and sequencing.

115 The genomic sequences of the  $B_{\text{sister}}$  genes from *A. alpina* (Willing et al., 2015) had been kindly  
116 provided before publication by George Coupland. Based on these sequences we predicted the  
117 CDS as described above and verified it subsequently by PCR and sequencing.

118 The CDS of the *ABS*-like gene from *Tarenaya hassleriana* was taken from (Bhide et al., 2014).  
119 Using this information, primers were designed for the amplification of cDNA and genomic  
120 DNA of the  $B_{\text{sister}}$  gene. The raw reads of the genome sequence of *Cleome violaceae* were  
121 downloaded from the Joint Genome Institute (Grigoriev et al., 2011). BLAST searches were  
122 conducted using first the CDS of the *ABS*-like gene from *T. hassleriana* as query and  
123 subsequently sequences of the assembled parts of the genomic locus of the *ABS*-like gene of *C.*  
124 *violaceae*. All resulting sequences were assembled after each BLAST search until the genomic  
125 locus was complete.

126

## 127 **Perl Script for visualization of the alignment of exon-intron structures**

```
128 #!/usr/bin/perl
129
130 use strict;
131 use warnings;
132
133 # call main
134 main();
135
136 # main
137 sub main {
138
139     # define variables
140
141     my %exons;
142     my %length;
143     my %seq;
144     my @genes;
145     my $name;
146     my $count;
147     my $start;
148     my $end;
149     my $max = 0;
150     my $num = 0;
151     my $alignmentfile;
152     my $exons;
153     my $output;
154
155     # read command line parameters
156
157     my $length = @ARGV;
158
159     if ($length < 5){
```

```

160         print "Call program like this: perl exon_intron_structure_align.pl -a
161 <alignment-file> -e <exonpositions-file> -o <output-file>\n";
162         die();
163     }
164     else {
165         foreach (my $i=0; $i<$length; $i++){
166             if ($ARGV[$i] eq "-a"){
167                 $alignmentfile = $ARGV[$i+1];
168             }
169             if ($ARGV[$i] eq "-e"){
170                 $exons = $ARGV[$i+1];
171             }
172             if ($ARGV[$i] eq "-o"){
173                 $output = $ARGV[$i+1];
174             }
175         }
176     }
177
178     # read positions of exons
179     open(EXONS, $exons);
180
181     while (<EXONS>){
182         if ($_ =~ /^(\w+)\s+(\d+)\s/){
183             $name = $1;
184             $length{$name} = $2;
185             push(@genes, $name);
186             if ($length{$name} > $max){
187                 $max = $length{$name};
188             }
189             $count = 0;
190             while ($_ =~ /(\d+)-(\d+)/g){
191                 $exons{$name}{$count}{start} = $1;
192                 $exons{$name}{$count}{end} = $2;
193                 $count++;

```



```

194         }
195         $num++;
196     }
197 }
198
199 close(EXONS);
200
201 # read alignment
202
203 $name = "";
204 my $sequence = "";
205 my $prevpos;
206 my $currpos;
207
208 open(ALN, $alignmentfile);
209
210 while (<ALN>){
211     chomp($_);
212     if ($_ =~ />(\w+)/){
213         if ($name ne ""){
214             $seq{$name} = $sequence;
215         }
216         $name = $1;
217         $sequence = "";
218     }
219     else {
220         $sequence .= $_;
221     }
222 }
223
224 if ($name ne ""){
225     $seq{$name} = $sequence;
226 }
227 my $alnlength = length($sequence);

```

```

228
229     close(ALN);
230
231     # draw exon-intron-structure and alignment
232
233     my $xsize = $max + 200;
234     my $ysize = 200*$num + 150;
235     my $yposition;
236     my $len;
237     $num = 0;
238     my $previous = "";
239     my $prevypos;
240     my $currypos;
241
242     open(PS, ">$output");
243
244     print PS "%!PS-Adobe EPSF-3.0\n";
245     print PS "%BoundingBox: 0 0 $xsize $ysize\n";
246
247     foreach my $gene (@genes){
248         $yposition = $ysize - 100 - 200*$num;
249         $len = $length{$gene};
250         # print gene structure
251         print PS "newpath\n100 $yposition moveto\n$len 0 rlineto\nnclosepath\n0 0 0
252 setrgbcolor\n2 setlinewidth\nstroke\n";
253         print PS "/Times-Roman findfont\n20 scalefont\nsetfont\nnewpath\n0
254 $yposition moveto\n($gene) show\n";
255         foreach my $key (sort keys %{$exons{$gene}}){
256             $start = $exons{$gene}{$key}Re{start};
257             $end = $exons{$gene}{$key}{end};
258             $len = $end - $start;
259             $start += 100;

```

```

260             print PS "newpath\n$start $yposition moveto\n0 25 rlineto\n$len 0
261 rlineto\n0 -50 rlineto\n-$len 0 rlineto\nclosepath\ngsave\n0 0 0 setrgbcolor\nfill\nrestore\n0
262 0 0 setrgbcolor\n1 setlinewidth\nstroke\n";
263         }
264         # print conservation
265         if ($previous ne ""){
266             $prevpos = 100 + 0;
267             $currpos = 100 + 0;
268             $prevypos = $yposition + 200 - 30;
269             $currypos = $yposition + 30;
270             for (my $pos = 0; $pos < $alnlength; $pos++){
271                 if ((substr($seq{$previous}, $pos, 1) eq substr($seq{$gene},
272 $pos, 1)) && (substr($seq{$previous}, $pos, 1) ne "-")){
273                     print PS "newpath\n$prevpos $prevypos
274 moveto\n$currpos $currypos lineto\nclosepath\n0.7 0.7 0.7 setrgbcolor\n0.8
275 setlinewidth\nstroke\n";
276                 }
277                 if (substr($seq{$previous}, $pos, 1) ne "-"){
278                     $prevpos++;
279                 }
280                 if (substr($seq{$gene}, $pos, 1) ne "-"){
281                     $currpos++;
282                 }
283             }
284         }
285         $previous = $gene;
286         $num++;
287     }
288
289     close(PS);
290 }
291

```

292 **References**

- 293 **Afkhami, M.E., and Stinchcombe, J.R.** (2016). Multiple mutualist effects on genomewide  
294 expression in the tripartite association between *Medicago truncatula*, nitrogen-fixing  
295 bacteria and mycorrhizal fungi. *Molecular Ecology* **25**, 4946-4962.
- 296 **Ågren, J.A., Wang, W., Koenig, D., Neuffer, B., Weigel, D., and Wright, S.I.** (2014). Mating  
297 system shifts and transposable element evolution in the plant genus *Capsella*. *BMC*  
298 *genomics* **15**, 602.
- 299 **Al-Dous, E.K., George, B., Al-Mahmoud, M.E., Al-Jaber, M.Y., Wang, H., Salameh, Y.M.,**  
300 **Al-Azwani, E.K., Chaluvadi, S., Pontaroli, A.C., DeBarry, J., et al.** (2011). De novo  
301 genome sequencing and comparative genomics of date palm (*Phoenix dactylifera*). *Nat*  
302 *Biotechnol* **29**, 521-U584.
- 303 **Albert, V.A., Barbazuk, W.B., Der, J.P., Leebens-Mack, J., Ma, H., Palmer, J.D.,**  
304 **Rounsley, S., Sankoff, D., Schuster, S.C., and Soltis, D.E.** (2013). The Amborella  
305 Genome and the Evolution of Flowering Plants. *Science* **342**, 1241089.
- 306 **Altschul, S.F., Gish, W., Miller, W., Myers, E.W., and Lipman, D.J.** (1990). Basic local  
307 alignment search tool. *J Mol Biol* **215**, 403-410.
- 308 **Astudillo-Reyes, C., Fernandez, A.C., and Cichy, K.A.** (2015). Transcriptome  
309 characterization of developing bean (*Phaseolus vulgaris* L.) pods from two genotypes  
310 with contrasting seed zinc concentrations. *PLoS one* **10**, e0137157.
- 311 **Bhide, A., Schliesky, S., Reich, M., Weber, A.P., and Becker, A.** (2014). Analysis of the  
312 floral transcriptome of *Tarenaya hassleriana* (Cleomaceae), a member of the sister  
313 group to the Brassicaceae: towards understanding the base of morphological diversity  
314 in Brassicales. *BMC genomics* **15**, 140.
- 315 **Bond, D.M., Albert, N.W., Lee, R.H., Gillard, G.B., Brown, C.M., Hellens, R.P., and**  
316 **Macknight, R.C.** (2016). Infiltration-RNAseq: transcriptome profiling of  
317 *Agrobacterium*-mediated infiltration of transcription factors to discover gene function  
318 and expression networks in plants. *Plant Methods* **12**, 41.
- 319 **Dassanayake, M., Oh, D.H., Haas, J.S., Hernandez, A., Hong, H., Ali, S., Yun, D.J.,**  
320 **Bressan, R.A., Zhu, J.K., Bohnert, H.J., et al.** (2011). The genome of the  
321 extremophile crucifer *Thellungiella parvula*. *Nat Genet* **43**, 913-918.
- 322 **Dias, B.F.d.O., Simões-Araújo, J.L., Russo, C.A., Margis, R., and Alves-Ferreira, M.**  
323 (2005). Unravelling MADS-box gene family in *Eucalyptus* spp.: a starting point to an  
324 understanding of their developmental role in trees. *Genetics and Molecular Biology* **28**,  
325 501-510.

326 **Dorn, K.M., Fankhauser, J.D., Wyse, D.L., and Marks, M.D.** (2015). A draft genome of  
327 field pennycress (*Thlaspi arvense*) provides tools for the domestication of a new winter  
328 biofuel crop. *DNA Research* **22**, 121-131.

329 **Garcia-Lor, A., Garcia-Martinez, J.L., and Perez-Amador, M.A.** (2012). Identification of  
330 ovule and seed genes from *Citrus clementina*. *Tree Genetics & Genomes* **8**, 227-235.

331 **Gasteiger, E., Hoogland, C., Gattiker, A., Wilkins, M.R., Appel, R.D., and Bairoch, A.**  
332 (2005). Protein identification and analysis tools on the ExPASy server. In *The*  
333 *proteomics protocols handbook* (Springer), pp. 571-607.

334 **Goodstein, D.M., Shu, S., Howson, R., Neupane, R., Hayes, R.D., Fazo, J., Mitros, T.,**  
335 **Dirks, W., Hellsten, U., Putnam, N., et al.** (2012). Phytozome: a comparative platform  
336 for green plant genomics. *Nucleic Acids Res* **40**, D1178-1186.

337 **Grigoriev, I.V., Nordberg, H., Shabalov, I., Aerts, A., Cantor, M., Goodstein, D., Kuo, A.,**  
338 **Minovitsky, S., Nikitin, R., and Ohm, R.A.** (2011). The genome portal of the  
339 department of energy joint genome institute. *Nucleic acids research*, gkr947.

340 **Grimplet, J., Martínez-Zapater, J.M., and Carmona, M.J.** (2016). Structural and functional  
341 annotation of the MADS-box transcription factor family in grapevine. *BMC genomics*  
342 **17**, 1.

343 **Haudry, A., Platts, A.E., Vello, E., Hoen, D.R., Leclercq, M., Williamson, R.J., Forczek,**  
344 **E., Joly-Lopez, Z., Steffen, J.G., Hazzouri, K.M., et al.** (2013). An atlas of over  
345 90,000 conserved noncoding sequences provides insight into crucifer regulatory  
346 regions. *Nat Genet* **45**, 891-898.

347 **He, N.J., Zhang, C., Qi, X.W., Zhao, S.C., Tao, Y., Yang, G.J., Lee, T.H., Wang, X.Y., Cai,**  
348 **Q.L., Li, D., et al.** (2013). Draft genome sequence of the mulberry tree *Morus notabilis*.  
349 *Nature Communications* **4**.

350 **Hou, X.-J., Liu, S.-R., Khan, M.R.G., Hu, C.-G., and Zhang, J.-Z.** (2014). Genome-wide  
351 identification, classification, expression profiling, and SSR marker development of the  
352 MADS-box gene family in Citrus. *Plant molecular biology reporter* **32**, 28-41.

353 **Hu, T.T., Pattyn, P., Bakker, E.G., Cao, J., Cheng, J.F., Clark, R.M., Fahlgren, N.,**  
354 **Fawcett, J.A., Grimwood, J., Gundlach, H., et al.** (2011). The *Arabidopsis lyrata*  
355 genome sequence and the basis of rapid genome size change. *Nat Genet* **43**, 476-481.

356 **Huang, K., Louis, J.M., Donaldson, L., Lim, F.L., Sharrocks, A.D., and Clore, G.M.**  
357 (2000). Solution structure of the MEF2A-DNA complex: structural basis for the  
358 modulation of DNA bending and specificity by MADS-box transcription factors. *Embo*  
359 *J* **19**, 2615-2628.



360 **Huang, S., Ding, J., Deng, D., Tang, W., Sun, H., Liu, D., Zhang, L., Niu, X., Zhang, X.,**  
361 **and Meng, M.** (2013). Draft genome of the kiwifruit *Actinidia chinensis*. Nature  
362 communications **4**, 2640.

363 **Kagale, S., Koh, C., Nixon, J., Bollina, V., Clarke, W.E., Tuteja, R., Spillane, C., Robinson,**  
364 **S.J., Links, M.G., and Clarke, C.** (2014). The emerging biofuel crop *Camelina sativa*  
365 retains a highly undifferentiated hexaploid genome structure. Nat. Commun. **5**.

366 **Kang, C., Darwish, O., Geretz, A., Shahan, R., Alkharouf, N., and Liu, Z.** (2013). Genome-  
367 scale transcriptomic insights into early-stage fruit development in woodland strawberry  
368 *Fragaria vesca*. The Plant Cell **25**, 1960-1978.

369 **Kitashiba, H., Li, F., Hirakawa, H., Kawanabe, T., Zou, Z., Hasegawa, Y., Tonosaki, K.,**  
370 **Shirasawa, S., Fukushima, A., and Yokoi, S.** (2014). Draft sequences of the radish  
371 (*Raphanus sativus L.*) genome. DNA Research **21**, 481-490.

372 **Külahoglu, C., Denton, A.K., Sommer, M., Maß, J., Schliesky, S., Wrobel, T.J.,**  
373 **Berckmans, B., Gongora-Castillo, E., Buell, C.R., and Simon, R.** (2014).  
374 Comparative transcriptome atlases reveal altered gene expression modules between two  
375 Cleomaceae C3 and C4 plant species. The Plant Cell **26**, 3243-3260.

376 **Lee, C.-R., Wang, B., Mojica, J.P., Mandáková, T., Prasad, K.V.S.K., Goicoechea, J.L.,**  
377 **Perera, N., Hellsten, U., Hundley, H.N., Johnson, J., et al.** (2017). Young inversion  
378 with multiple linked QTLs under selection in a hybrid zone. Nature Ecology &  
379 Evolution **1**, 0119.

380 **Li, T., Qi, X., Zeng, Q., Xiang, Z., and He, N.** (2014). MorusDB: a resource for mulberry  
381 genomics and genome biology. Database **2014**, bau054.

382 **Magallón, S., Gómez-Acevedo, S., Sánchez-Reyes, L.L., and Hernández-Hernández, T.**  
383 (2015). A metacalibrated time-tree documents the early rise of flowering plant  
384 phylogenetic diversity. New Phytologist **207**, 437-453.

385 **Ming, R., VanBuren, R., Liu, Y.L., Yang, M., Han, Y.P., Li, L.T., Zhang, Q., Kim, M.J.,**  
386 **Schatz, M.C., Campbell, M., et al.** (2013). Genome of the long-living sacred lotus  
387 (*Nelumbo nucifera Gaertn.*). Genome Biology **14**.

388 **Moghe, G.D., Hufnagel, D.E., Tang, H., Xiao, Y., Dworkin, I., Town, C.D., Conner, J.K.,**  
389 **and Shiu, S.-H.** (2014). Consequences of whole-genome triplication as revealed by  
390 comparative genomic analyses of the wild radish *Raphanus raphanistrum* and three  
391 other Brassicaceae species. Plant Cell **6**, 1925–1937.

392 **Motamayor, J.C., Mockaitis, K., Schmutz, J., Haiminen, N., Livingstone III, D., Cornejo,**  
393 **O., Findley, S.D., Zheng, P., Utro, F., and Royaert, S.** (2013). The genome sequence

394 of the most widely cultivated cacao type and its use to identify candidate genes  
395 regulating pod color. *Genome biology* **14**, r53.

396 **Myburg, A.A., Grattapaglia, D., Tuskan, G.A., Hellsten, U., Hayes, R.D., Grimwood, J.,**  
397 **Jenkins, J., Lindquist, E., Tice, H., Bauer, D., et al.** (2014). The genome of  
398 *Eucalyptus grandis*. *Nature* **510**, 356-+.

399 **Pellegrini, L., Song, T., and Richmond, T.J.** (1995). Structure of serum response factor core  
400 bound to DNA. *Nature* **376**, 490-498.

401 **Pradhan, S., Bandhiwal, N., Shah, N., Kant, C., Gaur, R., and Bhatia, S.** (2014). Global  
402 transcriptome analysis of developing chickpea (*Cicer arietinum* L.) seeds. *Frontiers in*  
403 *Plant Science* **5**, 698.

404 **Prasad, K., Zhang, X., Tobon, E., and Ambrose, B.A.** (2010). The Arabidopsis Bsisiter  
405 MADS-box protein, GORDITA, represses fruit growth and contributes to integument  
406 development. *Plant J* **62**, 203-214.

407 **Reyes-Chin-Wo, S., Wang, Z., Yang, X., Kozik, A., Arikrit, S., Song, C., Xia, L., Froenicke,**  
408 **L., Lavelle, D.O., Truco, M.-J., et al.** (2017). Genome assembly with in vitro  
409 proximity ligation data and whole-genome triplication in lettuce. *Nature*  
410 *Communications* **8**, 14953.

411 **Salamov, A.A., and Solovyev, V.V.** (2000). Ab initio gene finding in Drosophila genomic  
412 DNA. *Genome Res* **10**, 516-522.

413 **Sayers, E.W., Barrett, T., Benson, D.A., Bolton, E., Bryant, S.H., Canese, K., Chetvernin,**  
414 **V., Church, D.M., DiCuccio, M., and Federhen, S.** (2011). Database resources of the  
415 national center for biotechnology information. *Nucleic acids research* **39**, D38-D51.

416 **Shulaev, V., Sargent, D.J., Crowhurst, R.N., Mockler, T.C., Folkerts, O., Delcher, A.L.,**  
417 **Jaiswal, P., Mockaitis, K., Liston, A., Mane, S.P., et al.** (2011). The genome of  
418 woodland strawberry (*Fragaria vesca*). *Nature Genetics* **43**, 109-116.

419 **Sierro, N., Battey, J.N., Ouadi, S., Bovet, L., Goepfert, S., Bakaher, N., Peitsch, M.C., and**  
420 **Ivanov, N.V.** (2013). Reference genomes and transcriptomes of *Nicotiana sylvestris*  
421 and *Nicotiana tomentosiformis*. *Genome biology* **14**, R60.

422 **Singh, V.K., Garg, R., and Jain, M.** (2013). A global view of transcriptome dynamics during  
423 flower development in chickpea by deep sequencing. *Plant biotechnology journal* **11**,  
424 691-701.

425 **Song, Q.-X., Li, Q.-T., Liu, Y.-F., Zhang, F.-X., Ma, B., Zhang, W.-K., Man, W.-Q., Du,**  
426 **W.-G., Wang, G.-D., and Chen, S.-Y.** (2013). Soybean *GmbZIP123* gene enhances

lipid content in the seeds of transgenic *Arabidopsis* plants. Journal of experimental botany **64**, 4329-4341.

**Thompson, J.D., Gibson, T.J., Plewniak, F., Jeanmougin, F., and Higgins, D.G.** (1997). The CLUSTAL\_X windows interface: flexible strategies for multiple sequence alignment aided by quality analysis tools. Nucleic Acids Res **25**, 4876-4882.

**Urasaki, N., Tarora, K., Shudo, A., Ueno, H., Tamaki, M., Miyagi, N., Adaniya, S., and Matsumura, H.** (2012). Digital transcriptome analysis of putative sex-determination genes in papaya (*Carica papaya*). PLoS One **7**, e40904.

**Varshney, R.K., Chen, W.B., Li, Y.P., Bharti, A.K., Saxena, R.K., Schlueter, J.A., Donoghue, M.T.A., Azam, S., Fan, G.Y., Whaley, A.M., et al.** (2012). Draft genome sequence of pigeonpea (*Cajanus cajan*), an orphan legume crop of resource-poor farmers. Nat Biotechnol **30**, 83-U128.

**Varshney, R.K., Song, C., Saxena, R.K., Azam, S., Yu, S., Sharpe, A.G., Cannon, S., Baek, J., Rosen, B.D., Tar'an, B., et al.** (2013). Draft genome sequence of chickpea (*Cicer arietinum*) provides a resource for trait improvement. Nat Biotechnol **31**, 240-246.

**Velasco, R., Zharkikh, A., Affourtit, J., Dhingra, A., Cestaro, A., Kalyanaraman, A., Fontana, P., Bhatnagar, S.K., Troggio, M., Pruss, D., et al.** (2010). The genome of the domesticated apple (*Malus x domestica* Borkh.). Nature Genetics **42**, 833-+.

**Verde, I., Abbott, A.G., Scalabrin, S., Jung, S., Shu, S.Q., Marroni, F., Zhebentyayeva, T., Dettori, M.T., Grimwood, J., Cattonaro, F., et al.** (2013). The high-quality draft genome of peach (*Prunus persica*) identifies unique patterns of genetic diversity, domestication and genome evolution. Nature Genetics **45**, 487-U447.

**Wang, N., Thomson, M., Bodles, W.J.A., Crawford, R.M.M., Hunt, H.V., Featherstone, A.W., Pellicer, J., and Buggs, R.J.A.** (2013). Genome sequence of dwarf birch (*Betula nana*) and cross-species RAD markers. Molecular Ecology **22**, 3098-3111.

**Williamson, R.J., Josephs, E.B., Platts, A.E., Hazzouri, K.M., Haudry, A., Blanchette, M., and Wright, S.I.** (2014). Evidence for widespread positive and negative selection in coding and conserved noncoding regions of *Capsella grandiflora*. Plos Genet **10**, e1004622.

**Willing, E.-M., Rawat, V., Mandáková, T., Maumus, F., James, G.V., Nordström, K.J., Becker, C., Warthmann, N., Chica, C., and Szarzynska, B.** (2015). Genome expansion of *Arabis alpina* linked with retrotransposition and reduced symmetric DNA methylation. Nature Plants **1**.

460 **Wu, G.A., Prochnik, S., Jenkins, J., Salse, J., Hellsten, U., Murat, F., Perrier, X., Ruiz, M.,**  
461 **Scalabrin, S., Terol, J., et al.** (2014). Sequencing of diverse mandarin, pummelo and  
462 orange genomes reveals complex history of admixture during citrus domestication. *Nat*  
463 *Biotechnol* **32**, 656-+.

464 **Yang, R.L., Jarvis, D.E., Chen, H., Beilstein, M.A., Grimwood, J., Jenkins, J., Shu, S.Q.,**  
465 **Prochnik, S., Xin, M.M., Ma, C., et al.** (2013). The reference genome of the halophytic  
466 plant *Eutrema salsugineum*. *Frontiers in Plant Science* **4**.

467 **Zhang, J., Tian, Y., Yan, L., Zhang, G., Wang, X., Zeng, Y., Zhang, J., Ma, X., Tan, Y.,**  
468 **and Long, N.** (2016). Genome of plant maca (*Lepidium meyenii*) illuminates genomic  
469 basis for high altitude adaptation in the central Andes. *Molecular plant* **9**, 1066–1077.

470 **Zhang, Q.X., Chen, W.B., Sun, L.D., Zhao, F.Y., Huang, B.Q., Yang, W.R., Tao, Y., Wang,**  
471 **J., Yuan, Z.Q., Fan, G.Y., et al.** (2012). The genome of *Prunus mume*. *Nature*  
472 *Communications* **3**.

473 **Zhao, J., Li, Y., Ding, L., Yan, S., Liu, M., Jiang, L., Zhao, W., Wang, Q., Yan, L., and**  
474 **Liu, R.** (2016). Phloem transcriptome signatures underpin the physiological  
475 differentiation of the pedicel, stalk and fruit of cucumber (*Cucumis sativus* L.). *Plant*  
476 *and Cell Physiology* **57**, 19-34.

477

478

479
